# Supplementary material for: Antitumor effects of chemically modified miR-143 lipoplexes in a mouse model of pelvic colorectal cancer via myristoylated alanine-rich C kinase substrate downregulation
Source: PubMed Central journal article supplement (PMC10783569; doi:10.1016/j.omtn.2023.102079), 2023-11-15
Supplement: mmc1.pdf [file mmc1.pdf]

**Supplemental information**

**Antitumor effects of chemically modified  
miR-143 lipoplexes in a mouse model of pelvic  
colorectal cancer via myristoylated alanine-rich  
C kinase substrate downregulation**

**Jun Arima, Kohei Taniguchi, Nobuhiko Sugito, Kazuki Heishima, Yoshihisa Tokumaru, Yosuke Inomata, Kazumasa Komura, Tomohito Tanaka, Masa-Aki Shibata, Sang-Woong Lee, and Yukihiro Akao**

# Figure S1

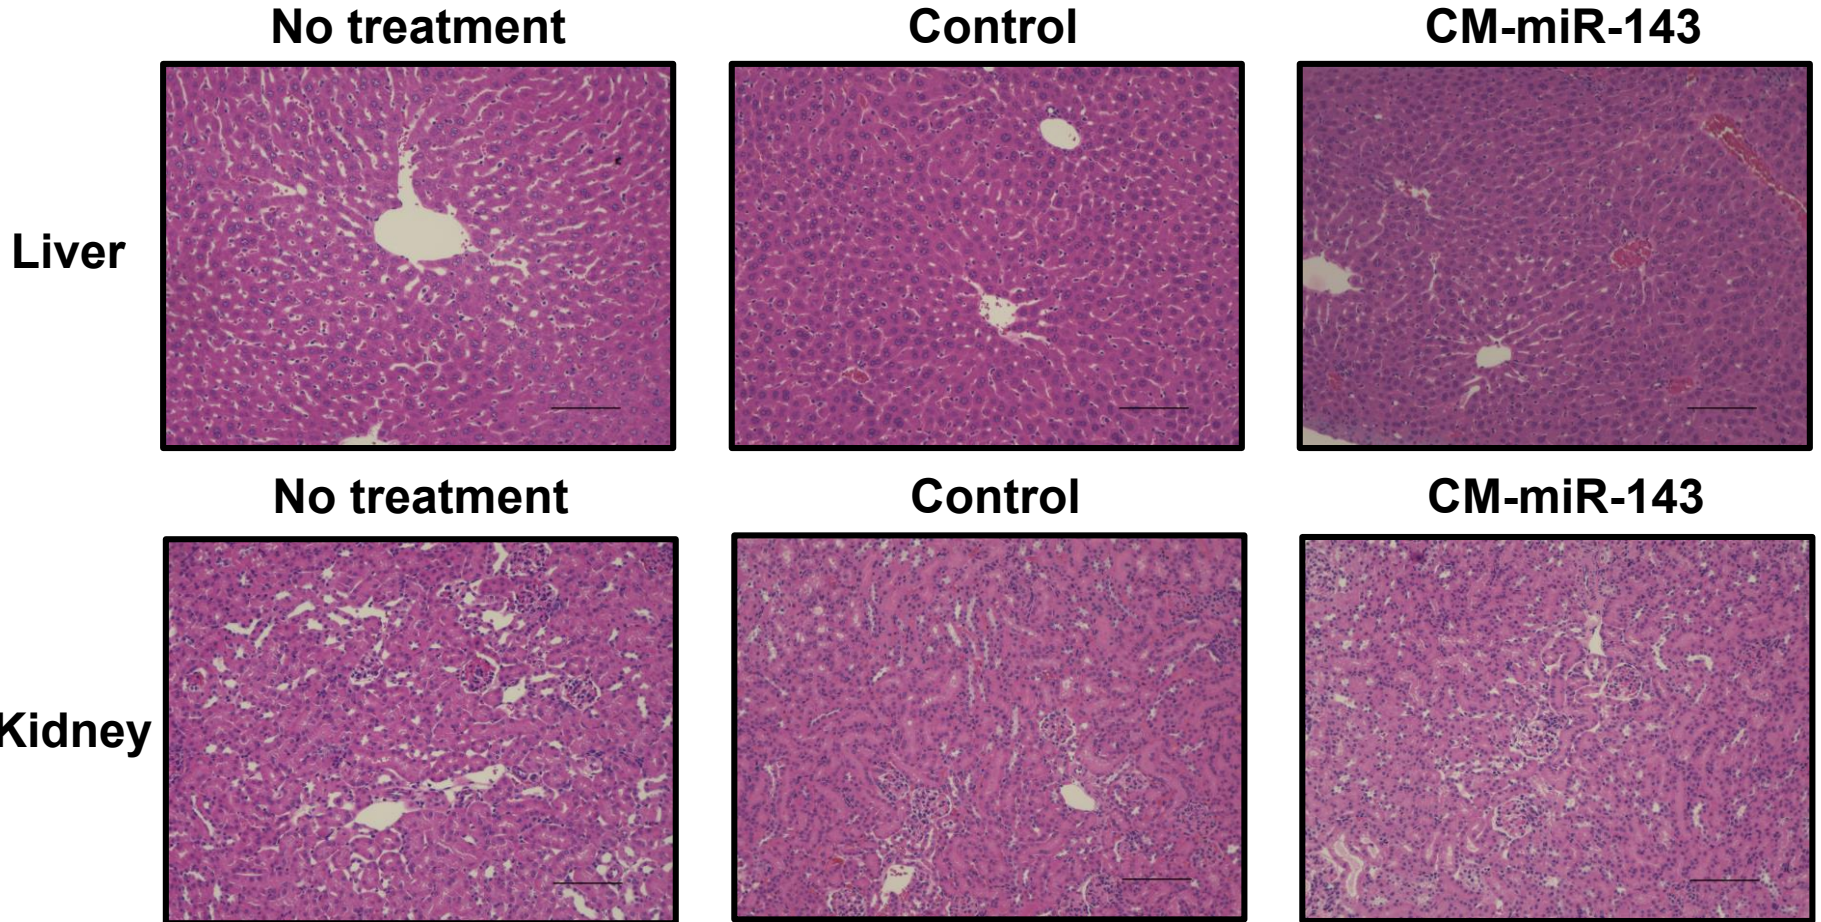

Bar = 100  $\mu$ m

**Figure S1. Representative images of pathological liver and kidney.**

Liver and kidney images in no treatment, control, and CM-miR-143 groups. In control and CM-miR-143 groups, miRNA lipoplexes were administered at least six times before euthanization. No apparent differences between the liver and kidney were detected across the three groups. No treatment group: mice neither administered miRNA nor InvivoFectamine™ 3.0.

# Figure S2

## DLD-1 clone#1-Luc mouse model

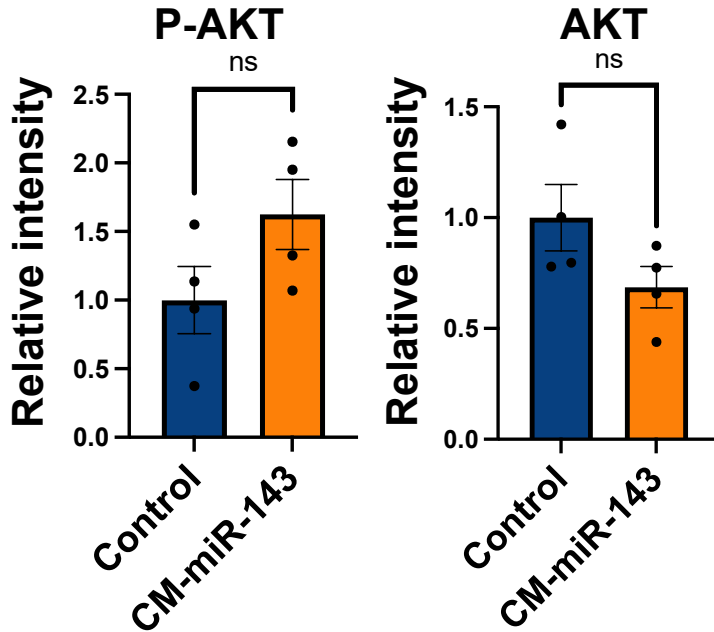

## HT-29-Luc mouse model

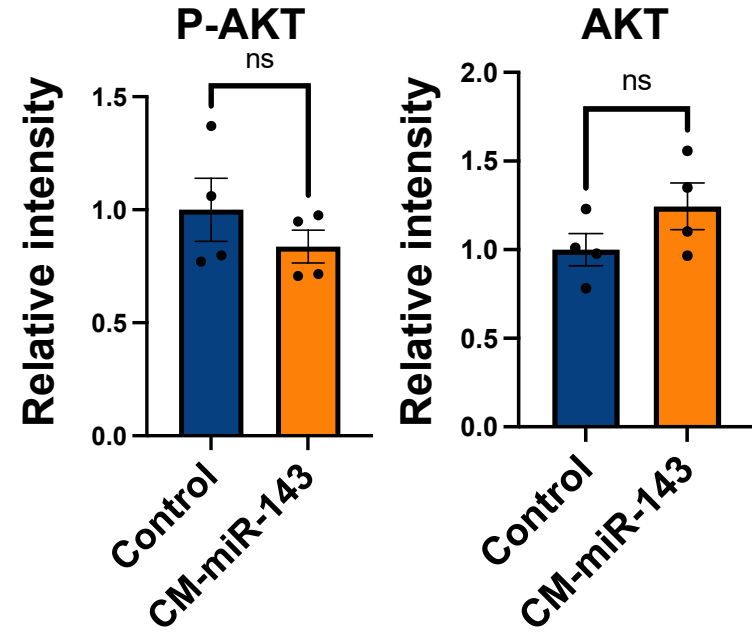

**Figure S2. Quantitative intensity of P-AKT and AKT bands.**

Quantitative intensity of P-AKT and AKT bands from western blots (Figure 3E) were calculated in ImageJ. Neither protein differed significantly between the control and CM-miR143 groups, based on tumor samples from DLD-1 clone#1-Luc and HT-29-Luc mouse models. Data are presented as mean  $\pm$  SEM (\* $P < 0.05$ ;  $n = 4$ ). SEM, standard error of the mean.

# Figure S3

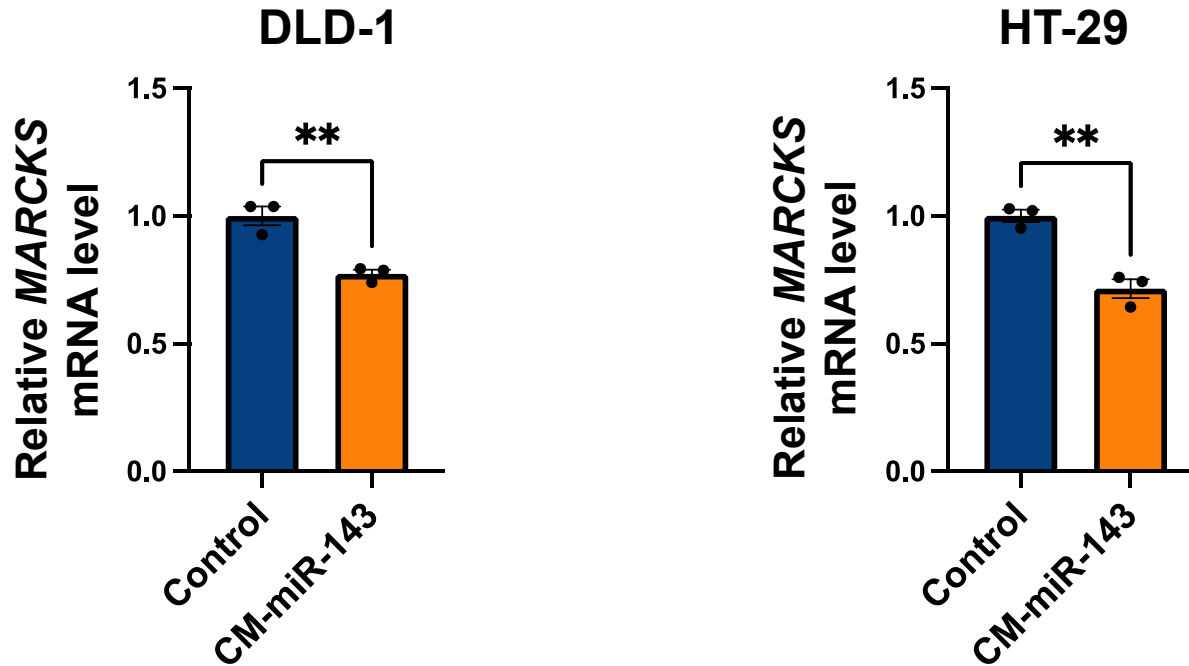

**Figure S3. *MARCKS* mRNA expression level**

The level of *MARCKS* mRNA expression was evaluated by qRT-PCR 48 h after transfection with control (10 nM) or CM-miR-143 (10 nM) with lipofectamine RNAiMAX in DLD-1 or HT-29 cells. CM-miR-143 suppressed *MARCKS* mRNA expression compared with the control. *GAPDH* was used as an internal control. Data are presented as mean  $\pm$  SEM (\*\*P < 0.01; n = 3). SEM, standard error of the mean.

# Figure S4

## Chemically modified miR-143

S: 3'-GGUCUCUACGUCGUGACGUGGAGU-5'

AS: 5'-U<sup>^</sup>G<sup>^</sup>AGAUGAAGCACUGUAGCUC<sup>^</sup>A<sup>^</sup>dT<sup>^</sup>dT-3'

**N**: 2'-Fluoro RNA, **N**: 2'-O-Methyl RNA, **N**: RNA without modification,  
**^**: Phosphorothioate, **dT**: deoxythymidine, **N**: mismatch

### Figure S4. Scheme of CM-miR-143 development.

Red and blue letters indicate modifications with fluorine and methoxy groups in the 2' position of the sugar ring, respectively. The black letter indicated no modification, “^” indicates phosphorothioate, and dT represents deoxythymidine. S:Sense RNA, AS:Anti-sense RNA

**Table S1. Validation of the miR143 and *MARCKS* interaction**

|                                                                          |                                   |
|--------------------------------------------------------------------------|-----------------------------------|
| miRNA gene name (ID)                                                     | miR143 (406935)                   |
| Target gene name (ID)                                                    | <i>MARCKS</i> (4082) <sup>a</sup> |
| Species name (ID)                                                        | <i>Homo sapiens</i> (9606)        |
| Sequence of the target region 5'-3'<br>(searched against TargetScan 8.0) | CAUCUC                            |
| Genomic location of MTI<br>(microRNA-target interaction)                 | 113860770-113860777               |
| Genomic location of 3' UTR <sup>b</sup>                                  | 191-197                           |

<sup>a</sup>*MARCKS*: myristoylated alanine-rich C kinase substrate

<sup>b</sup>3'UTR: 3' untranslated region
